# Supplementary material for: Differential Competitive Growth of Transgenic Subclones of Neuroblastoma Cells Expressing Different Levels of Cathepsin D Co-Cultured in 2D and 3D in Response to EGF: Implications in Tumor Heterogeneity and Metastasis
Source: MDPI journal article supplement (doi:10.3390/cancers16071343), 2024-03-29

MW

95 ▶

72 ▶

55 ▶

43 ▶

34 ▶

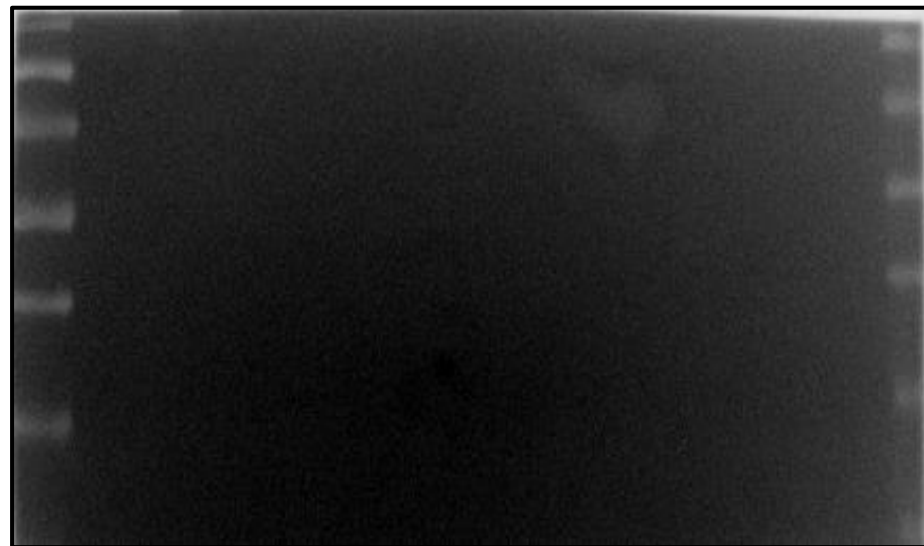

CD

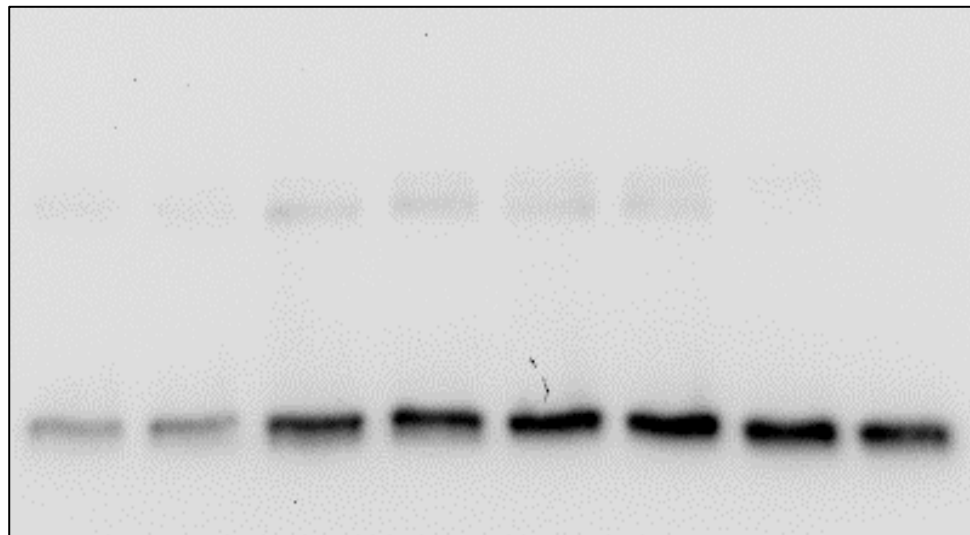

GAPDH

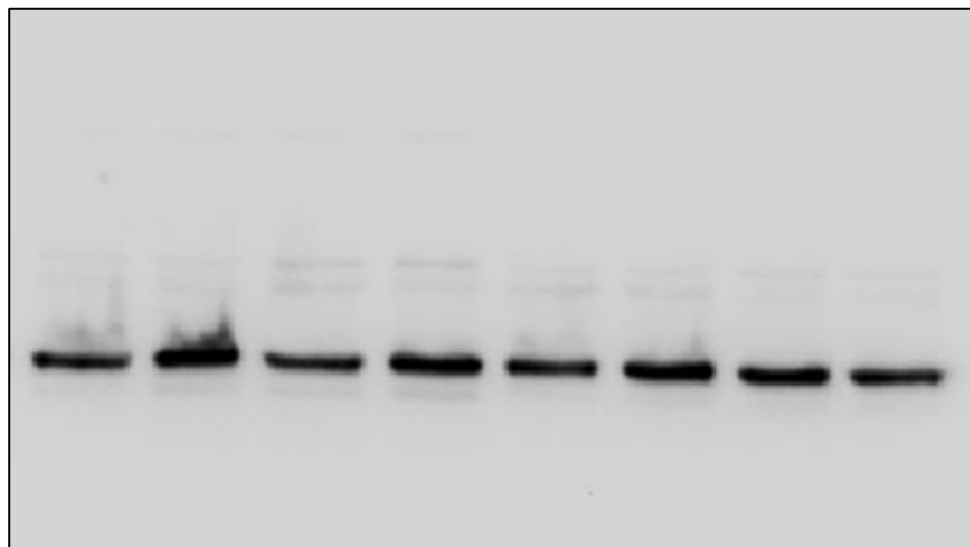

Figure 3A

MW

72 ►

55 ►

43 ►

34 ►

26 ►

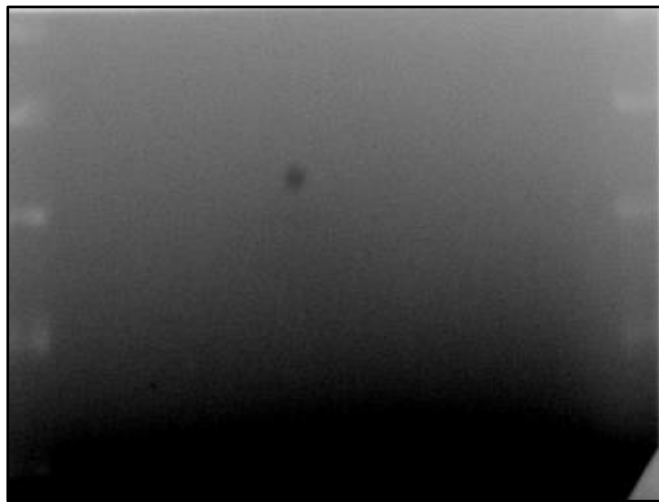

Figure 4A

CD

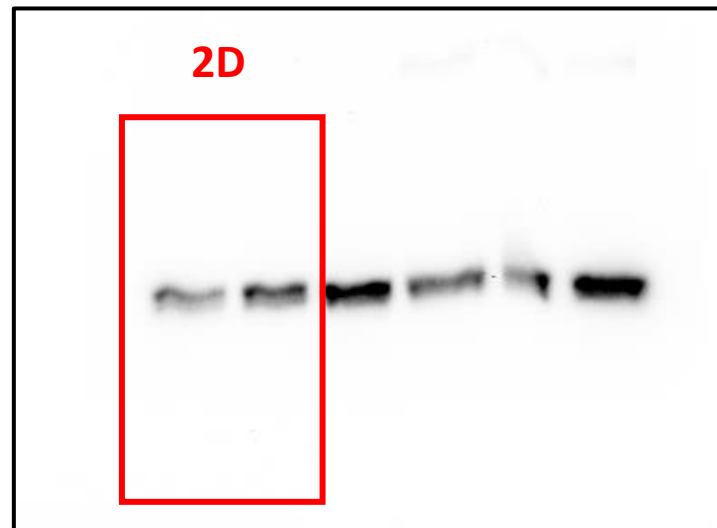

$\beta$ -TUB

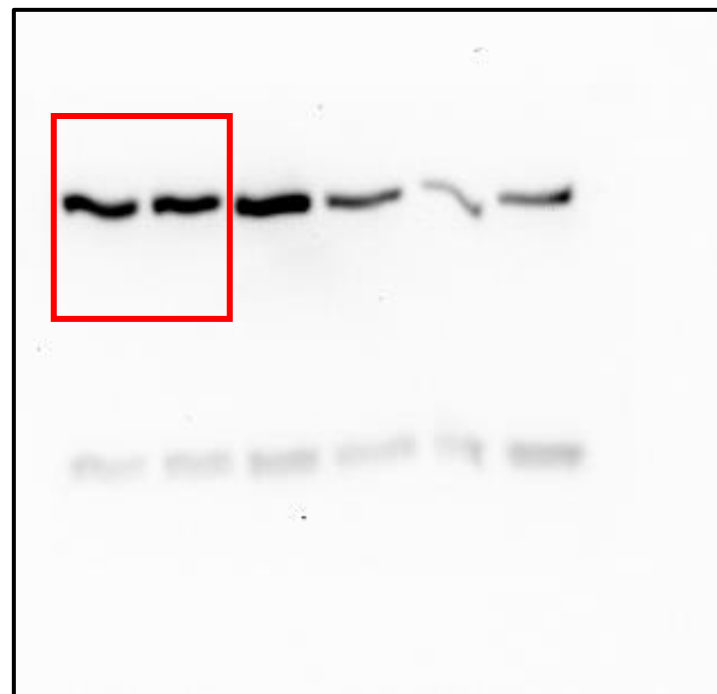

MW

95 ▶

72 ▶

55 ▶

43 ▶

34 ▶

26 ▶

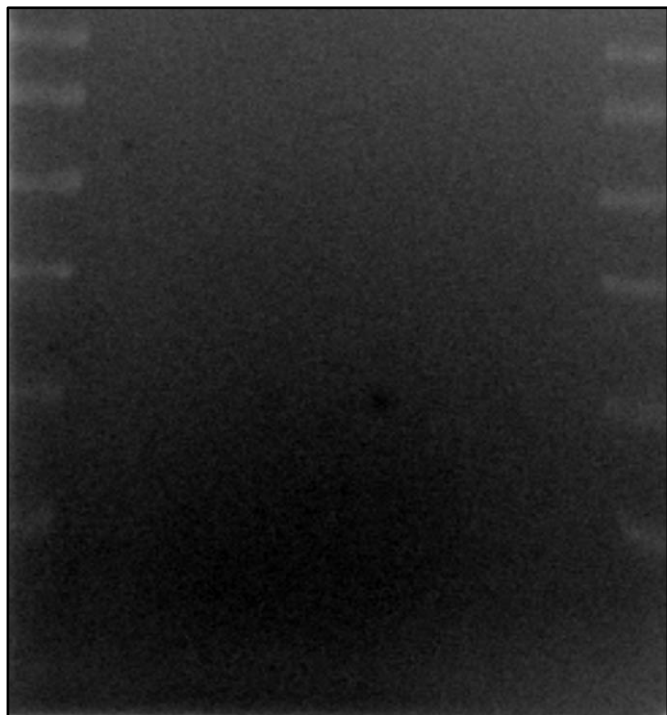

3D

CD

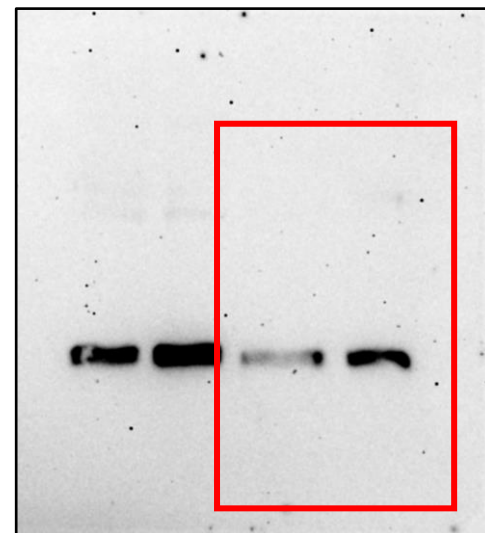

$\beta$ -TUB

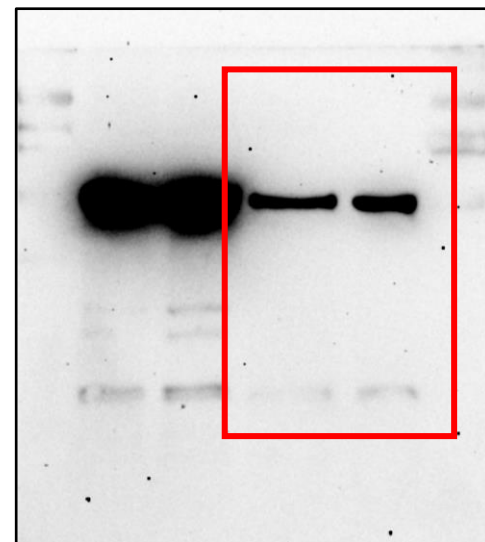

Figure 4A

Figure 5B

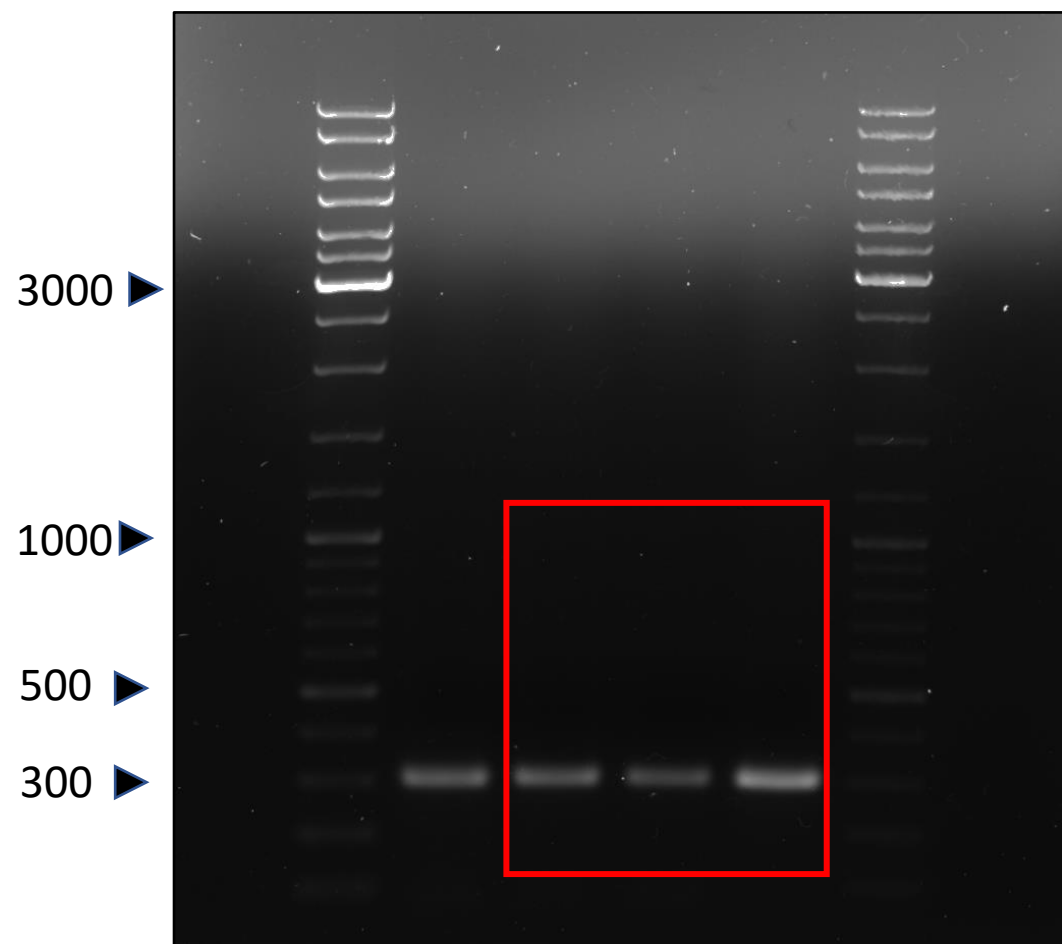

CD

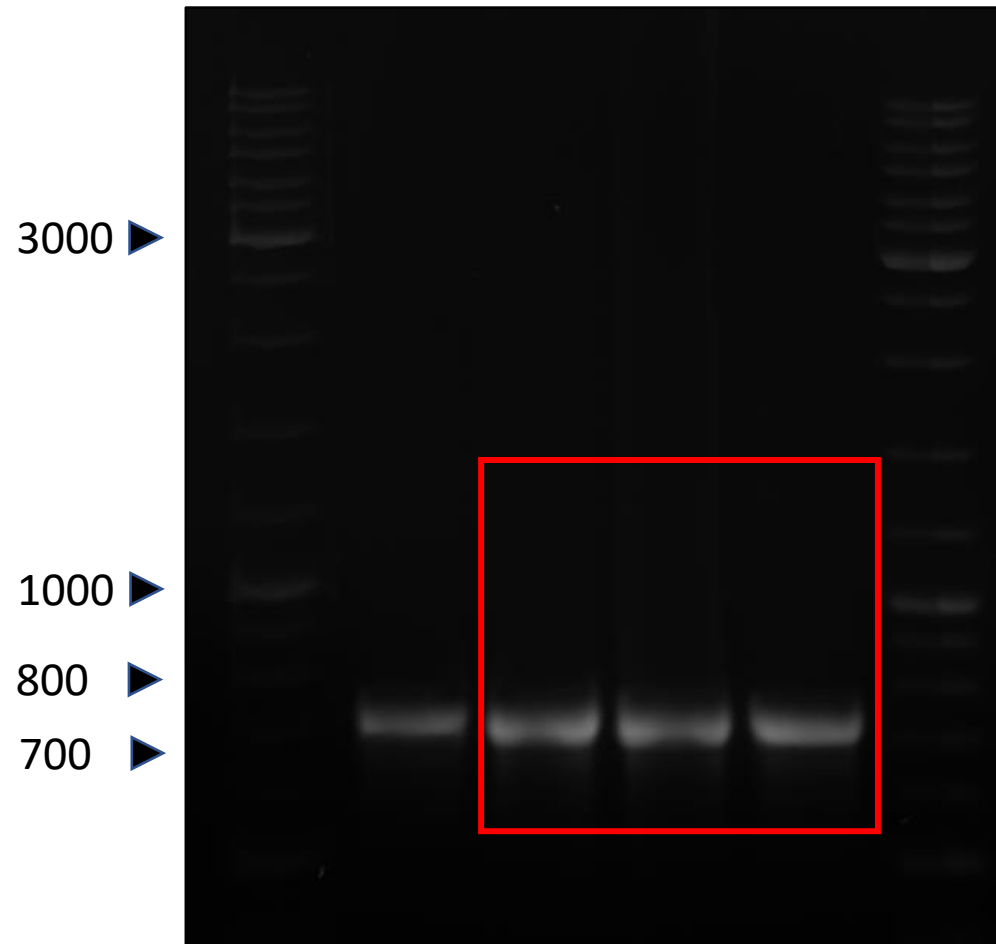

$\beta$  -ACTIN

MW

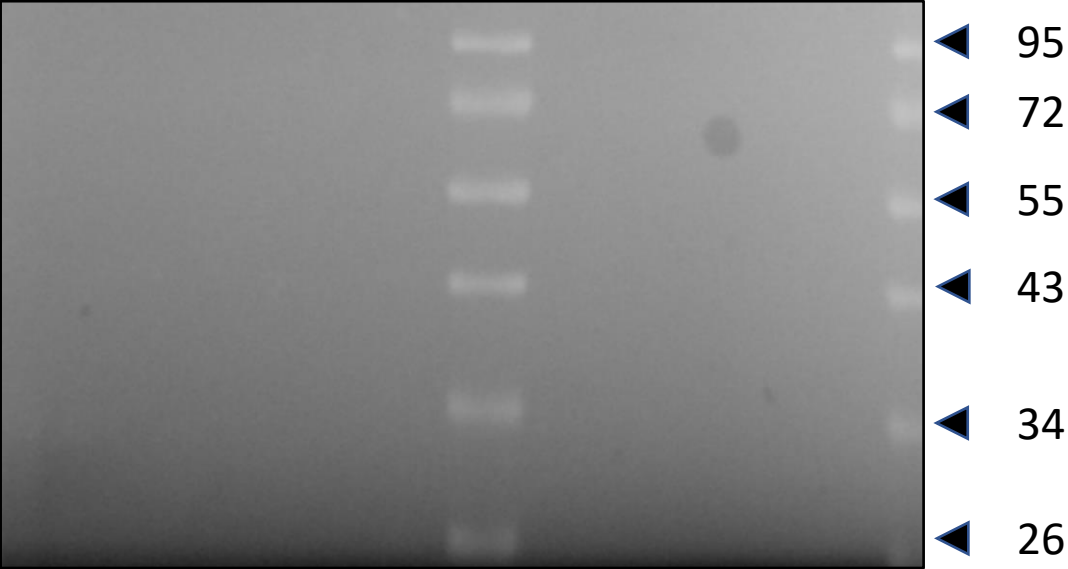

CD

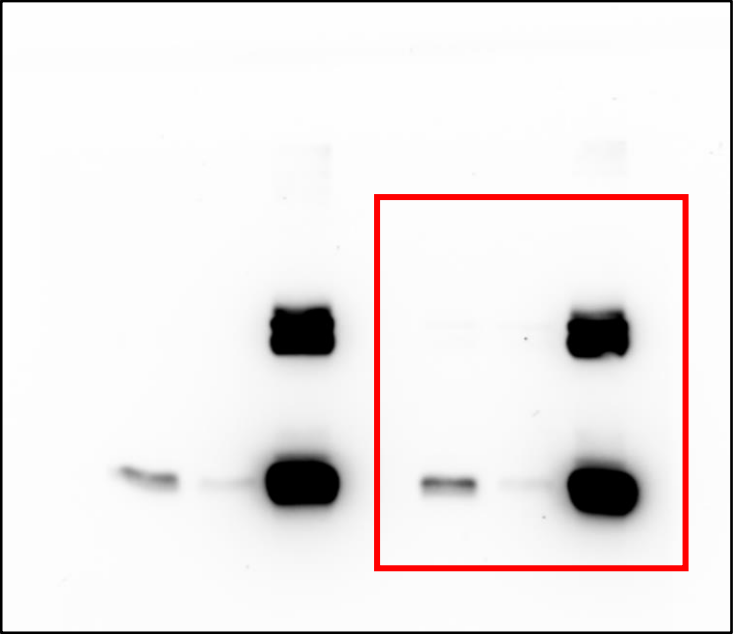

GAPDH

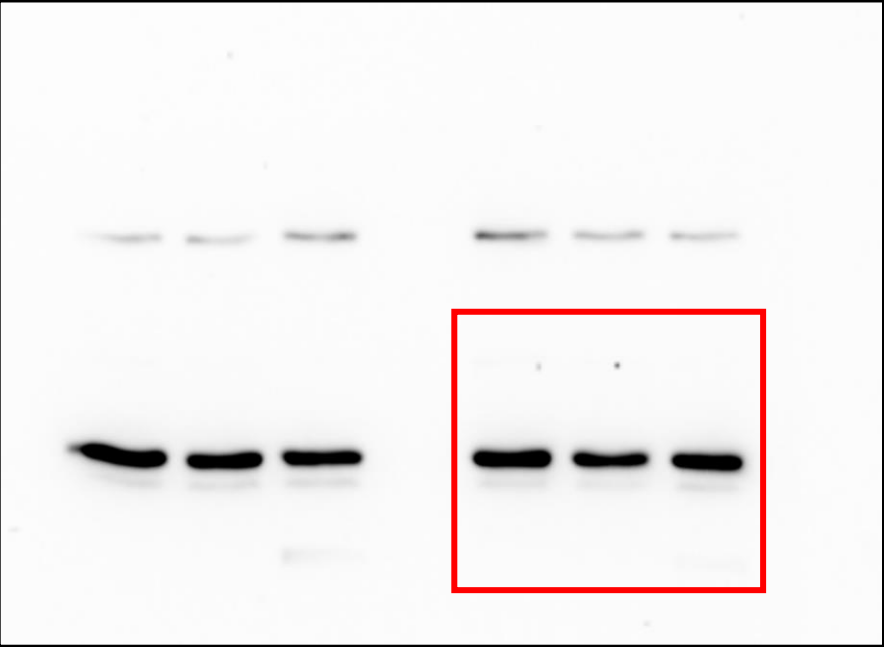

Figure 5C

Figure 6C

MW

95 ▶  
72 ▶  
55 ▶  
43 ▶  
34 ▶  
26 ▶

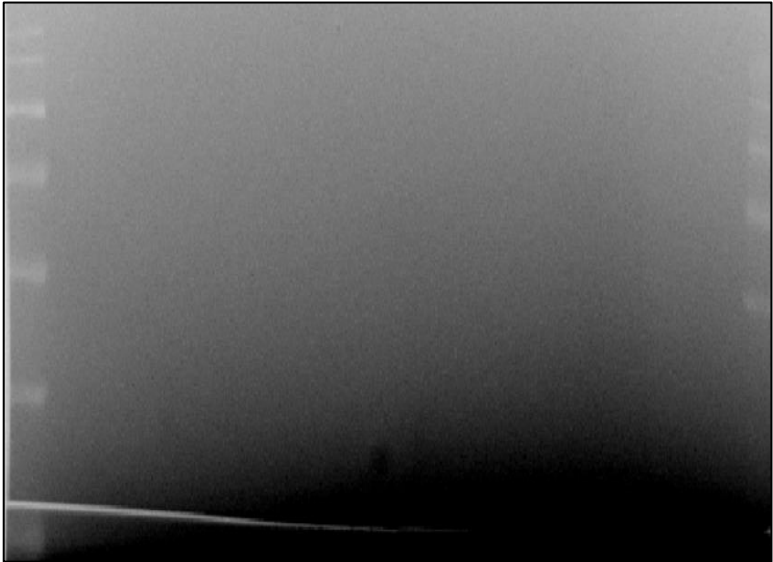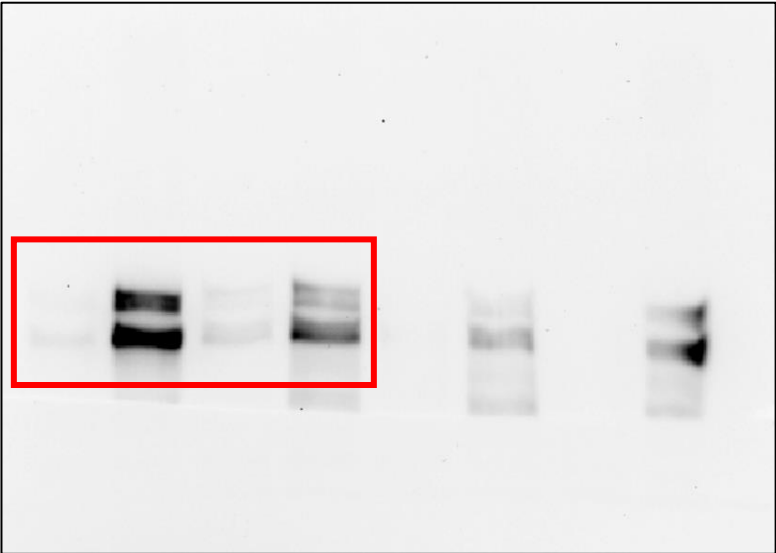

p-ERK 1/2

TUB

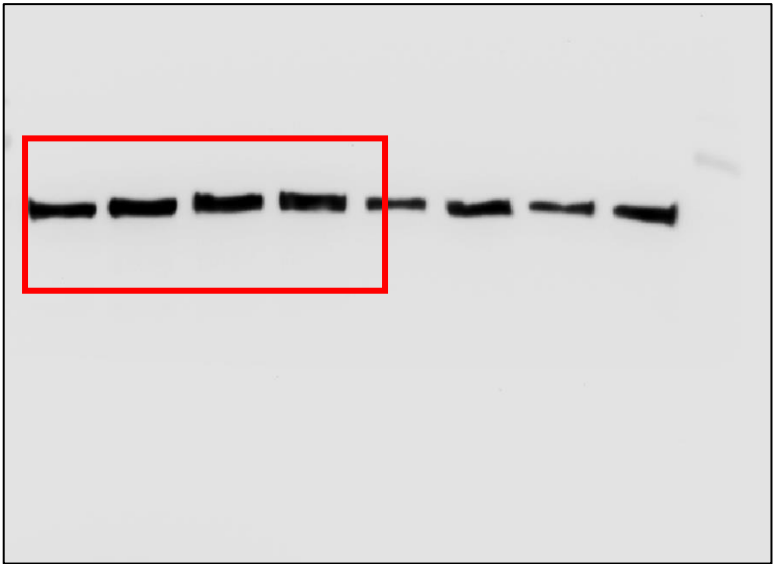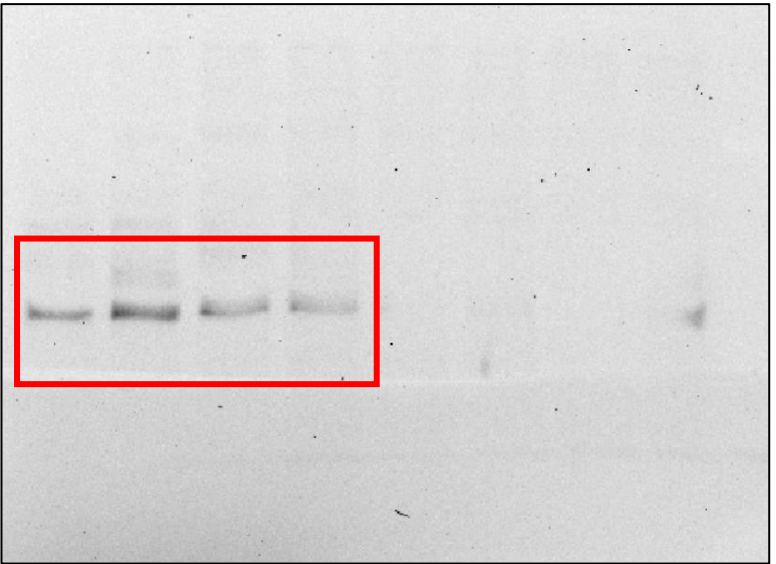

ERK 1/2

Figure 8A

MW

72 ▶

55 ▶

43 ▶

34 ▶

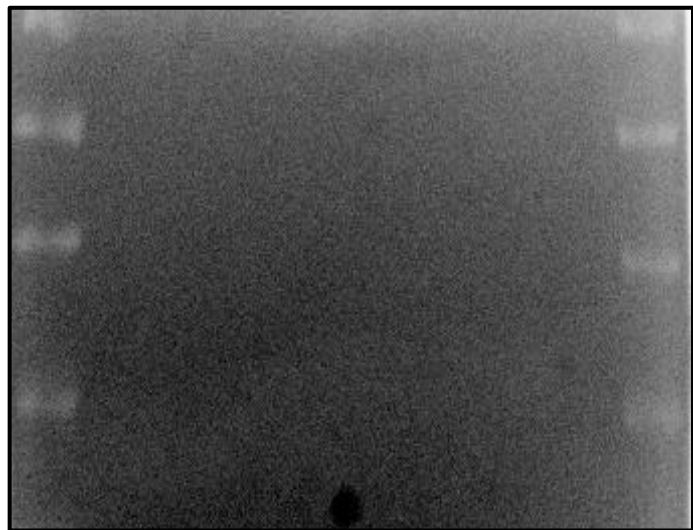

Time 0h

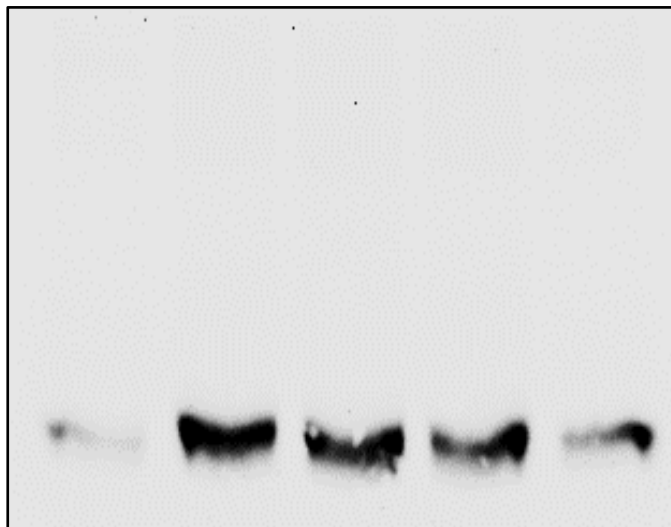

CD

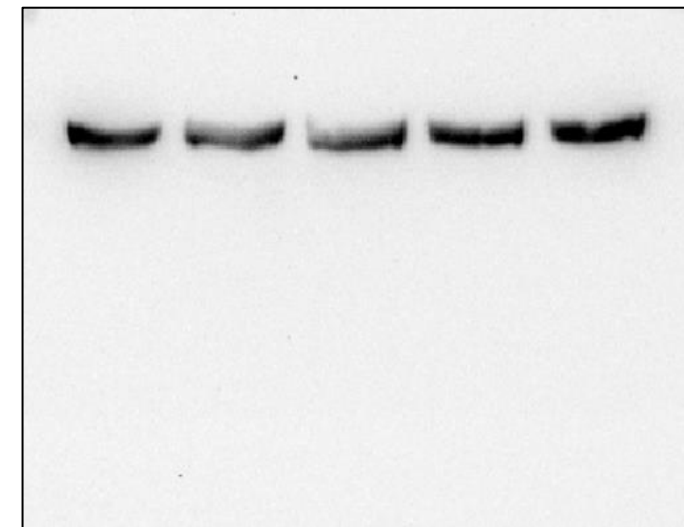

$\beta$ -TUB

Figure 8B

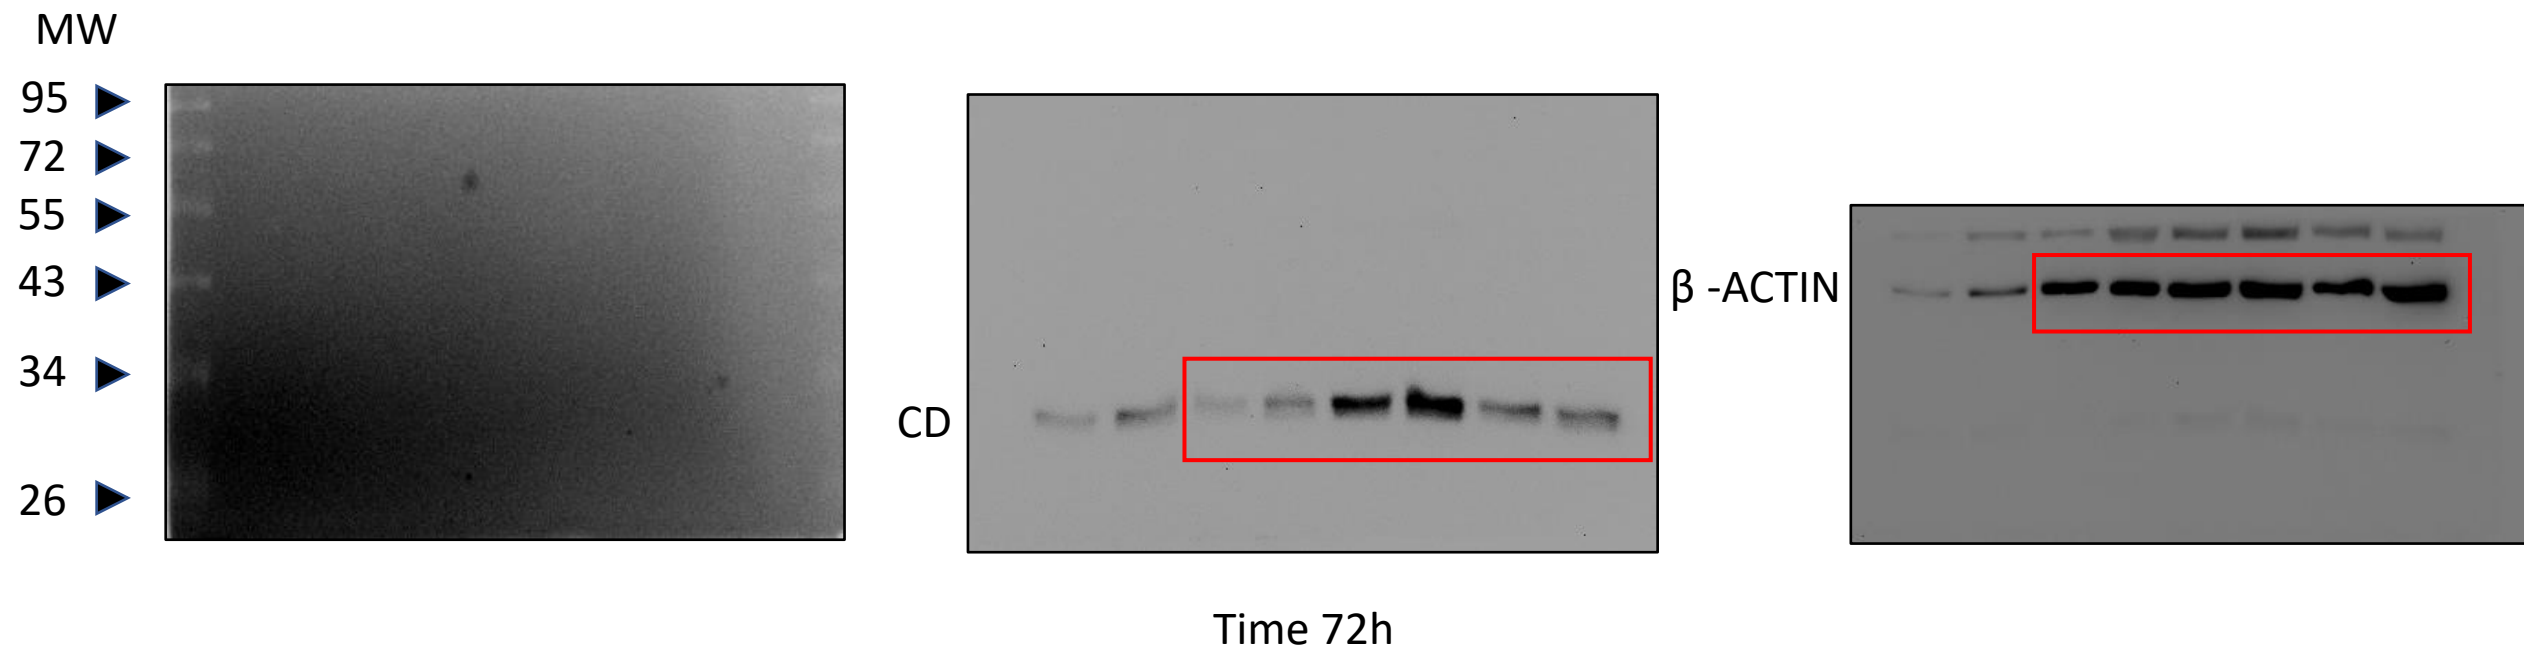



Figure 8C

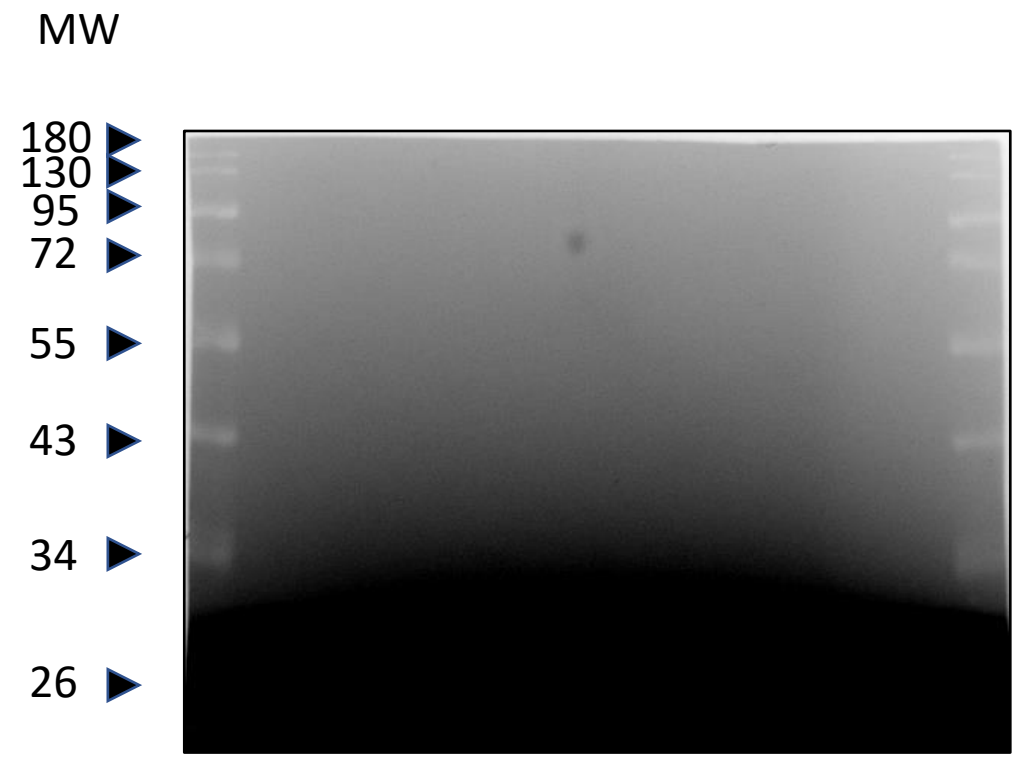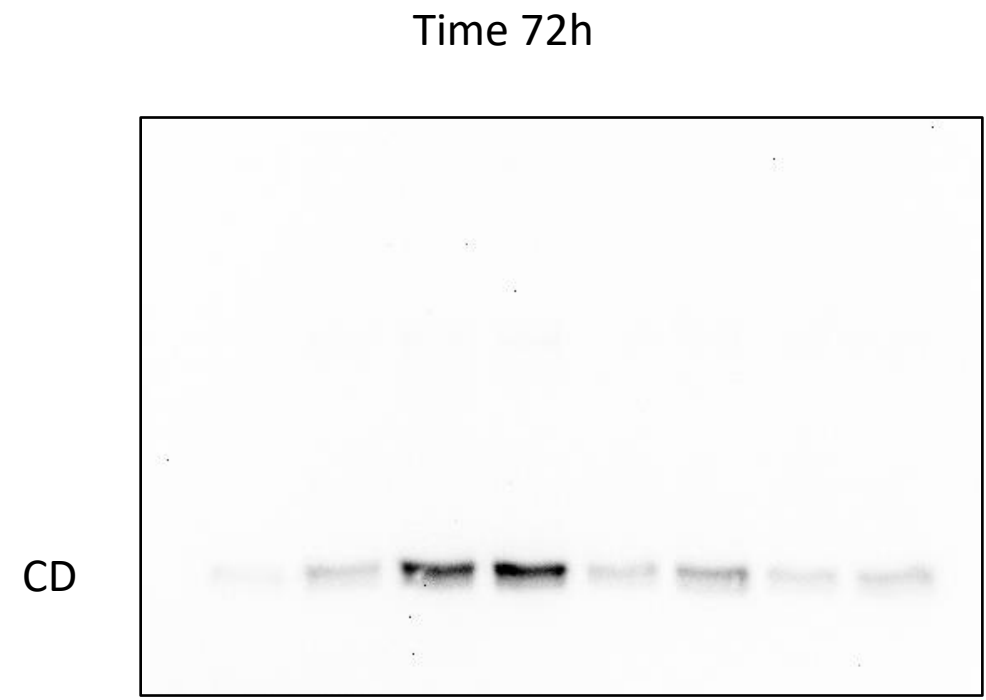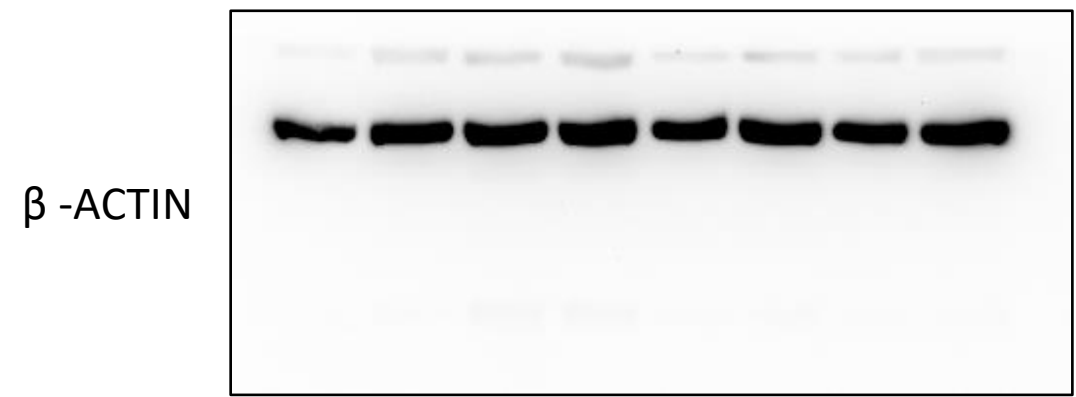

MW

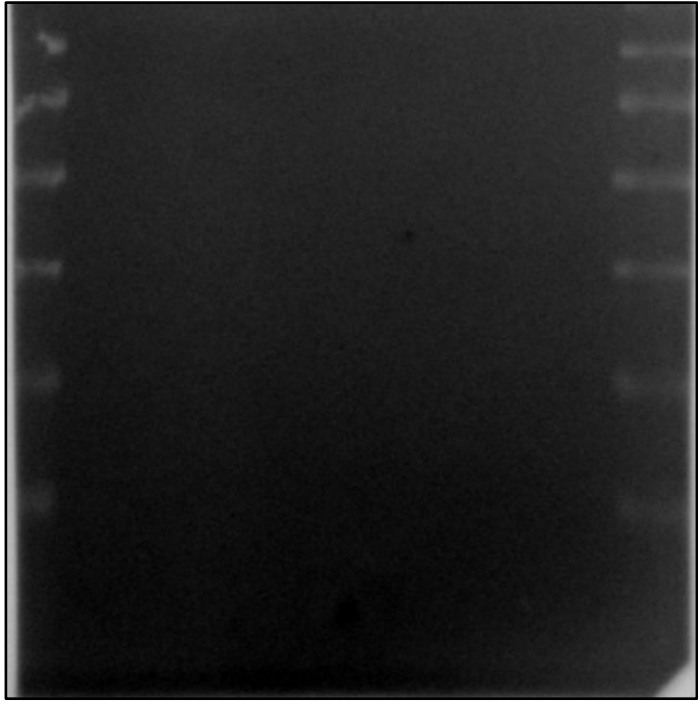

◀ 95  
◀ 72  
◀ 55  
◀ 43  
◀ 34  
◀ 26

CD

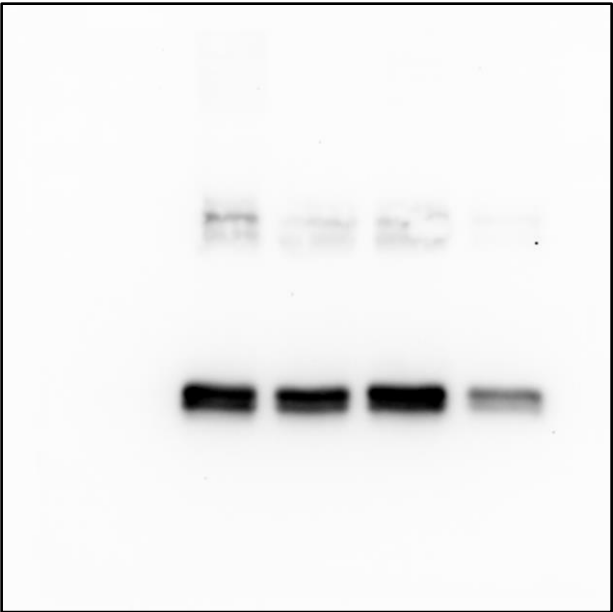

GAPDH

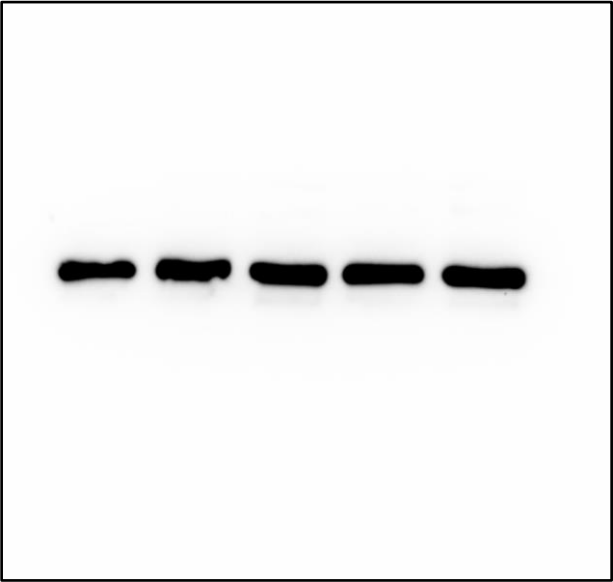

Figure 10A

MW

180 ▶  
130 ▶  
95 ▶  
72 ▶  
55 ▶  
43 ▶  
34 ▶  
26 ▶

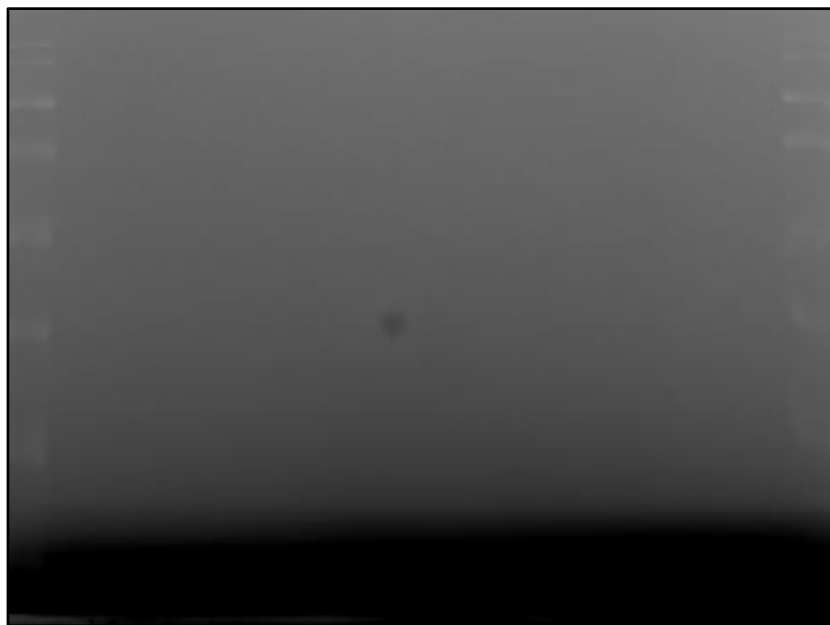

CD

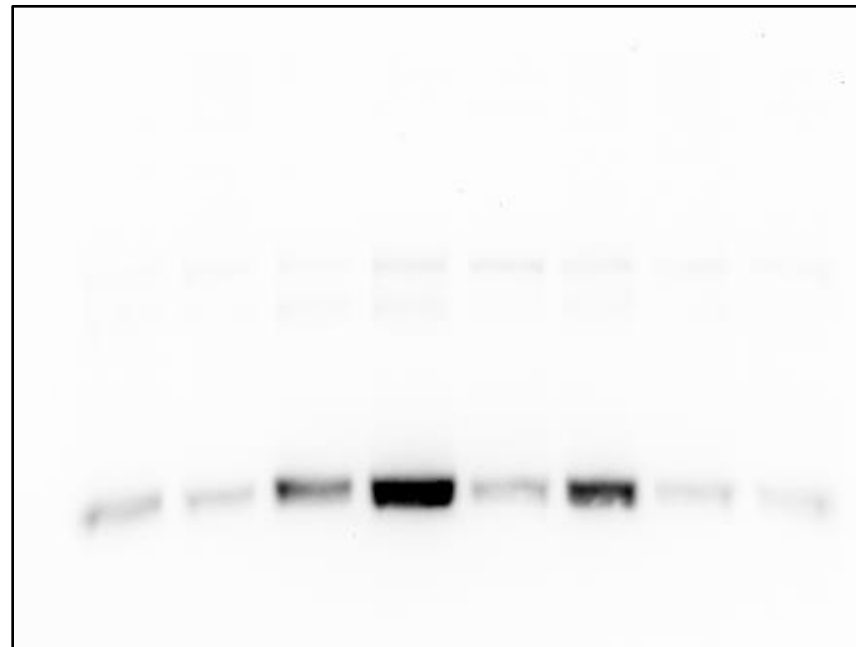

$\beta$  -TUB

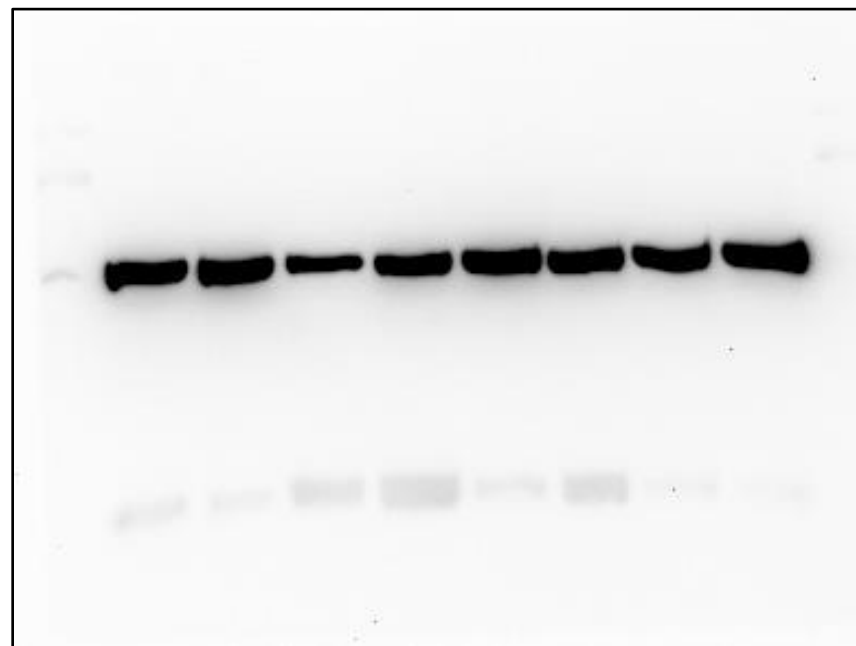

Figure 10B

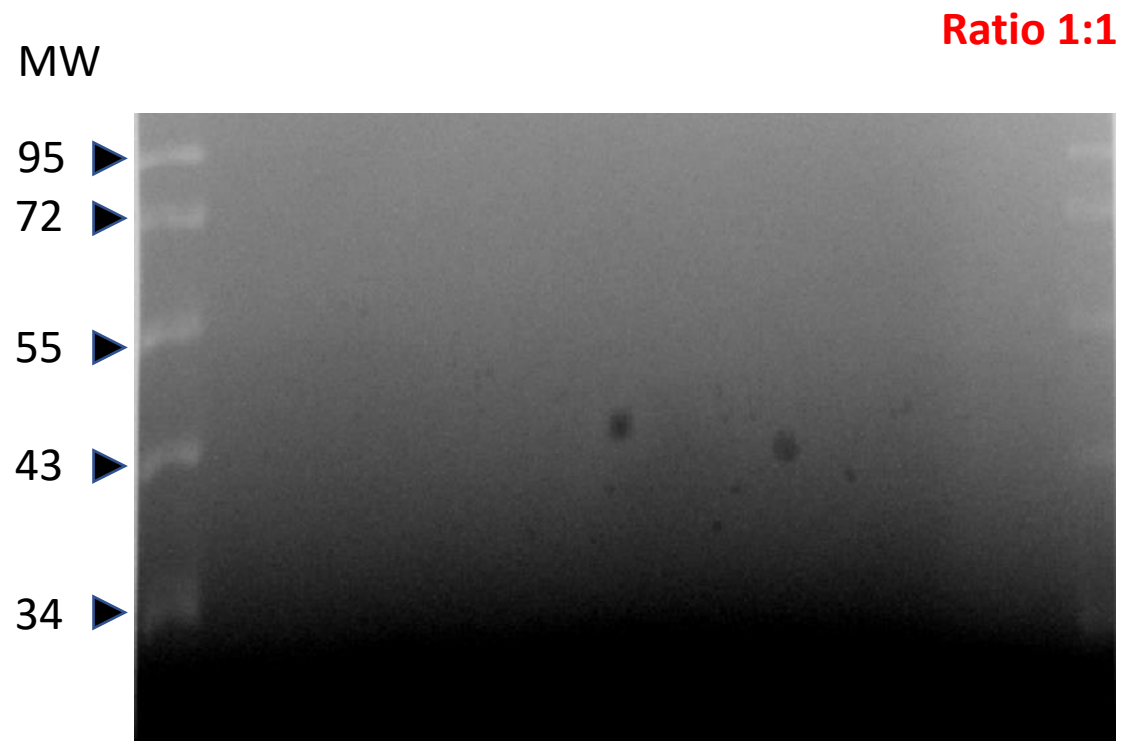

Figure 10B

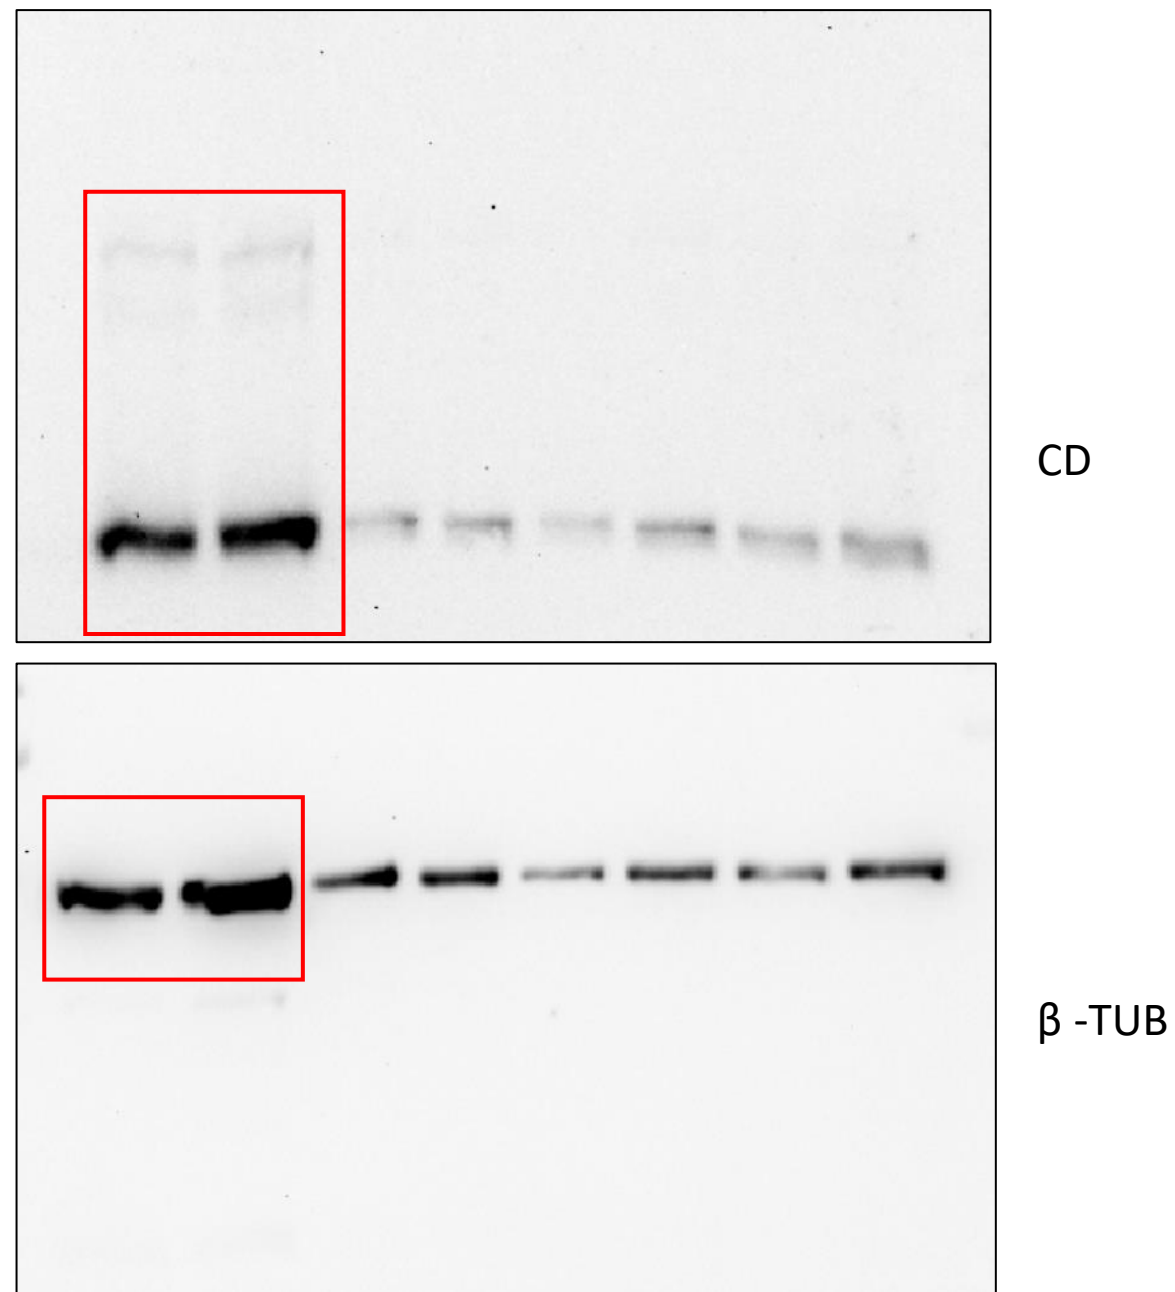

MW

95 ▶  
72 ▶  
55 ▶  
43 ▶  
34 ▶  
26 ▶

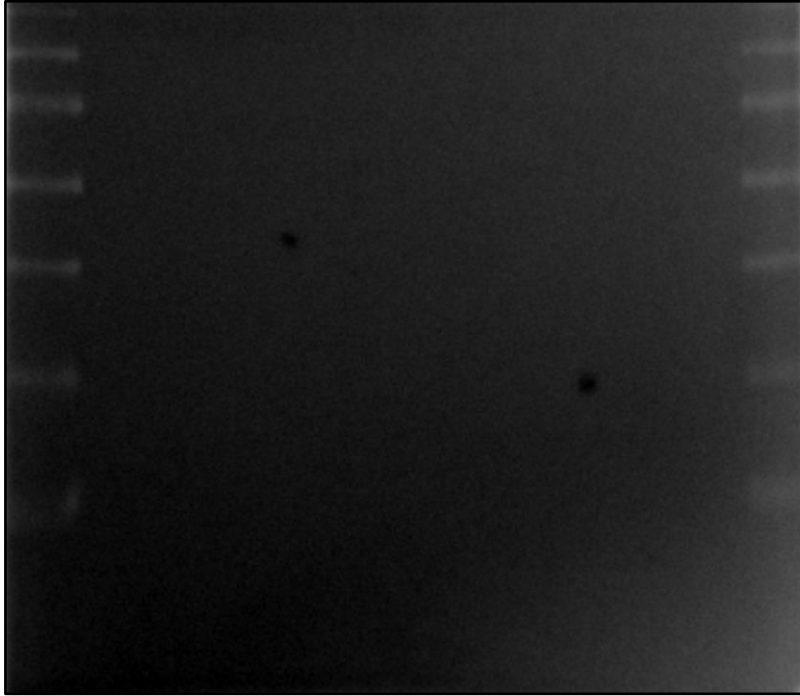

CD

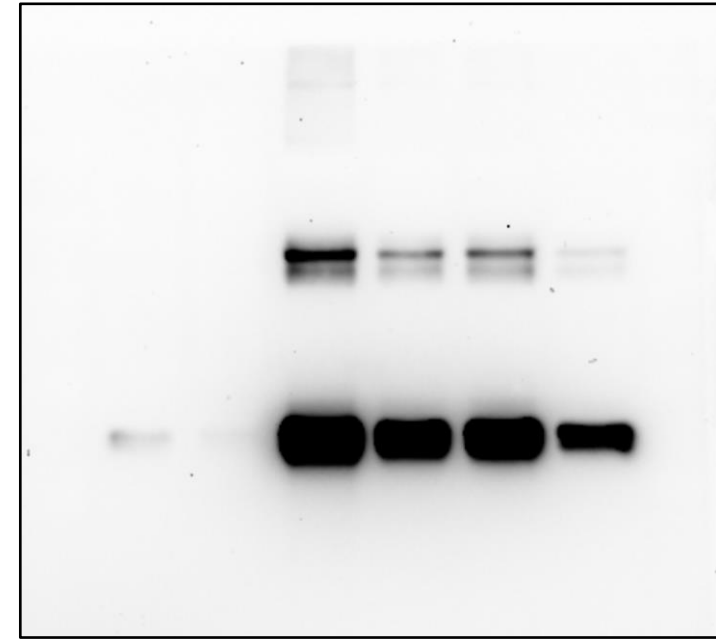

$\beta$ -TUB

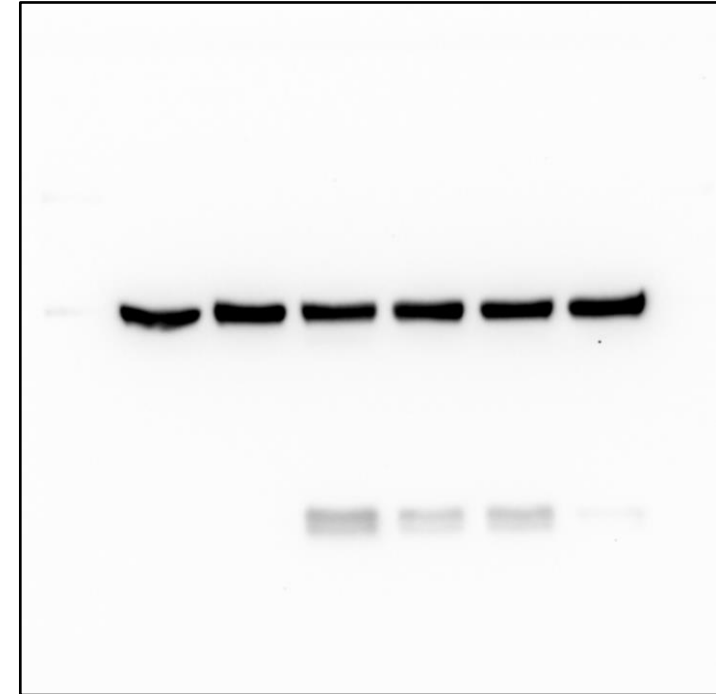

Figure 11C

MW

72 ▶

55 ▶

43 ▶

34 ▶

26 ▶

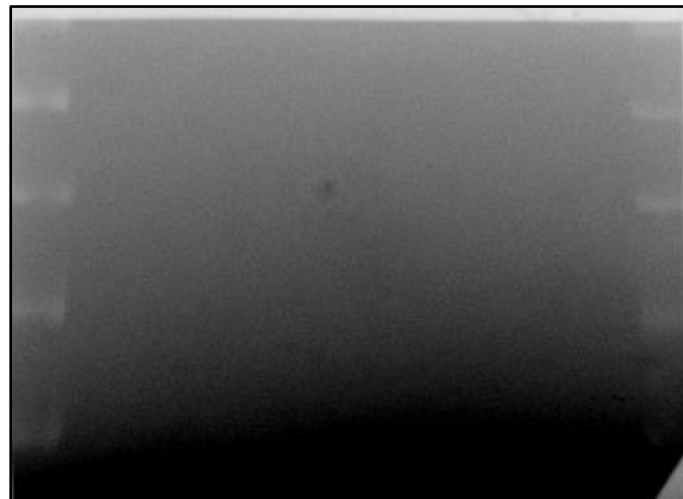

CD

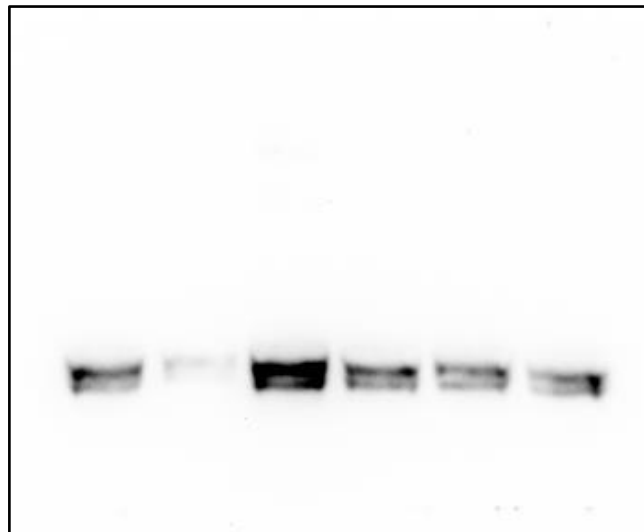

$\beta$  -TUB

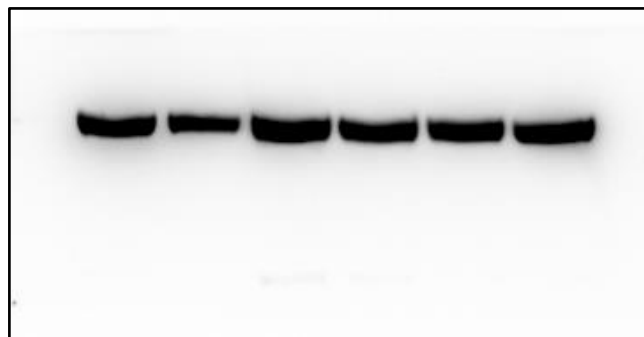

Figure 11D

MW

72 ▶

55 ▶

43 ▶

34 ▶

26 ▶

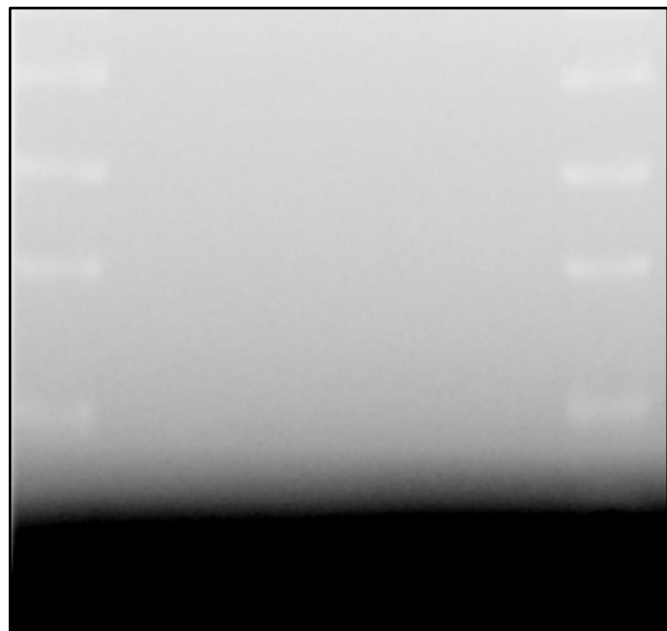

CD

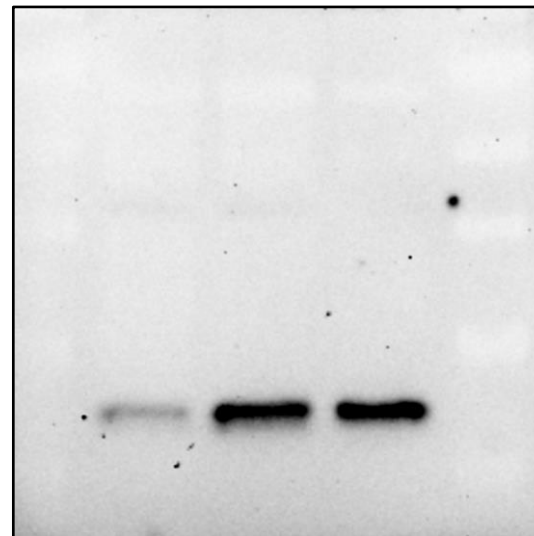

$\beta$  -TUB

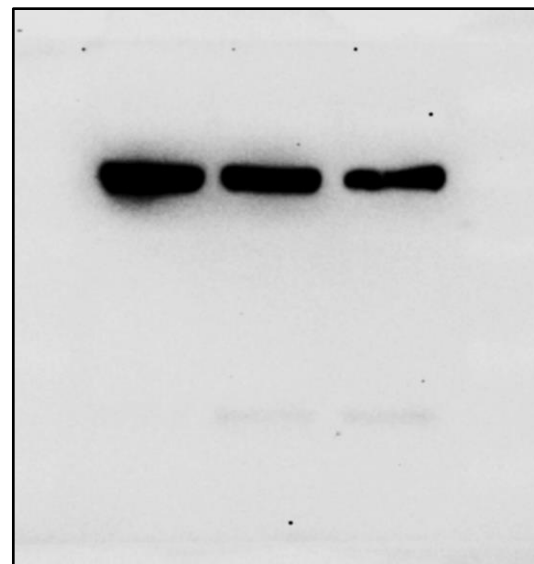

Figure 12C

Figure 12D

MW

95 ▶

72 ▶

55 ▶

43 ▶

34 ▶

26 ▶

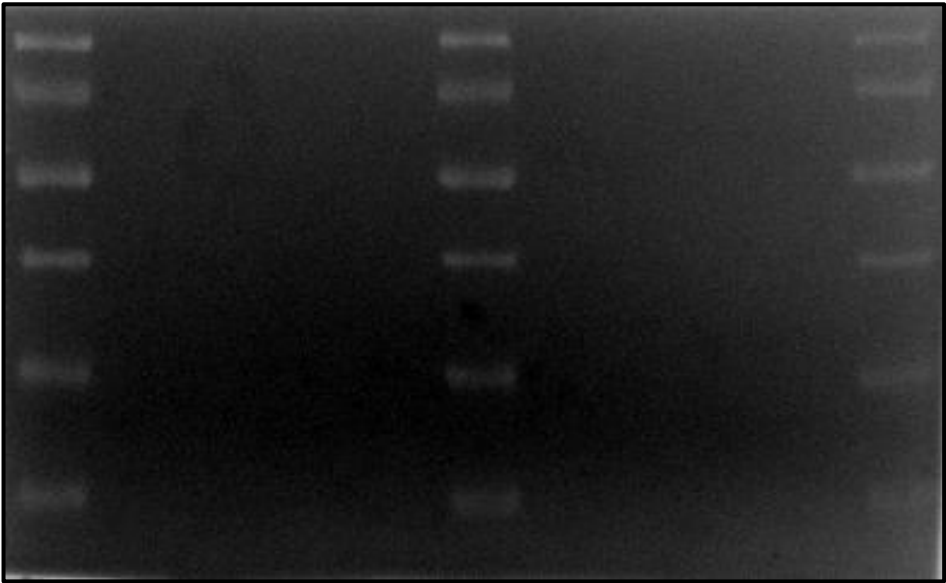

CD

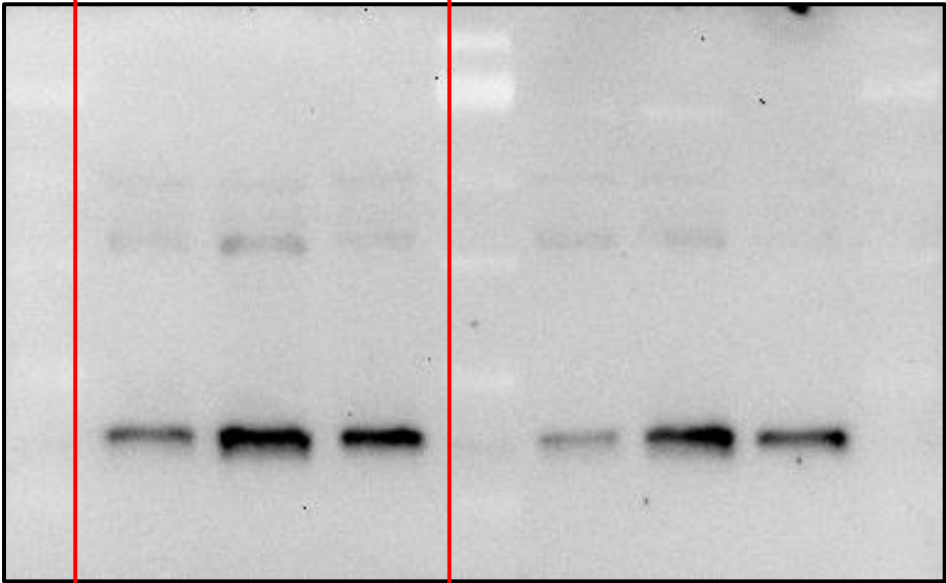

$\beta$ -TUB

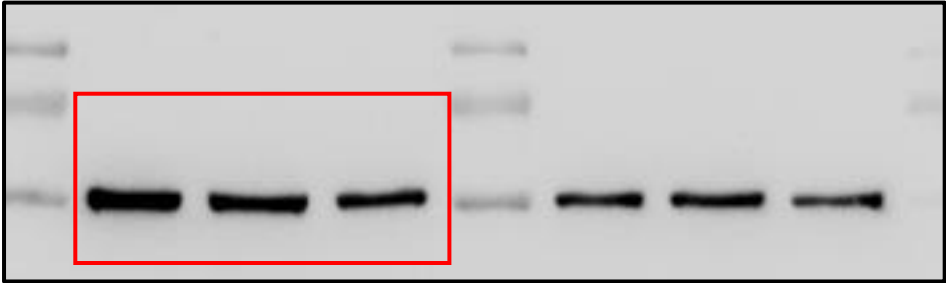



MW

Supplementary Figure S3 A

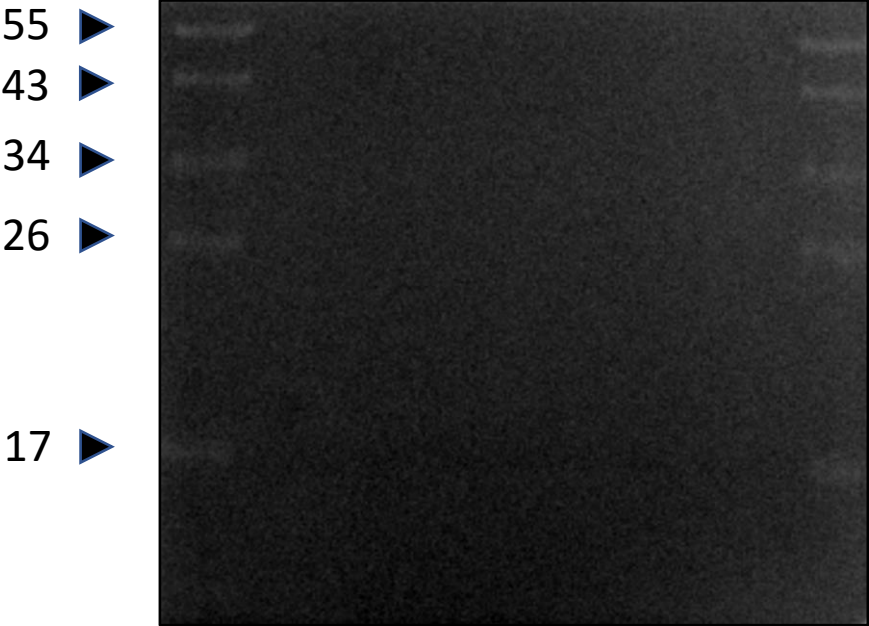

HISTONE H3

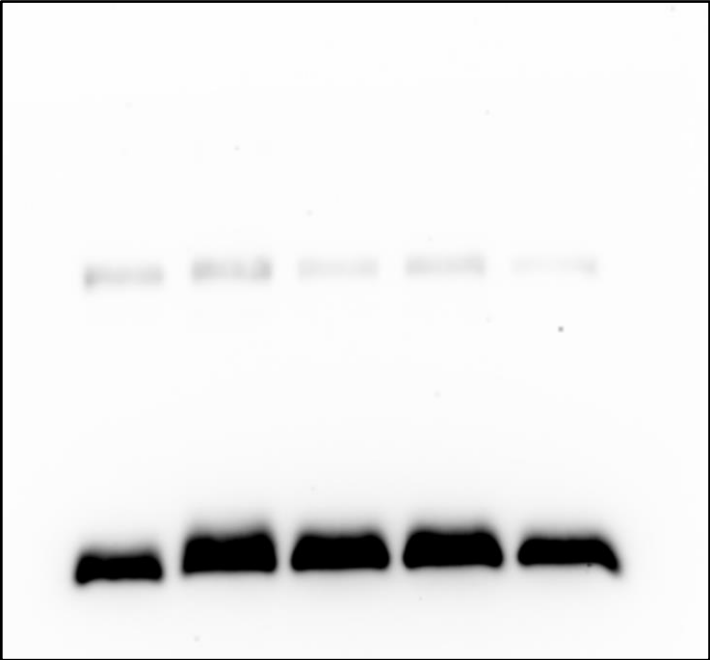

Supplementary Figure S3 B

MW

72 ►

55 ►

43 ►

34 ►

26 ►

17 ►

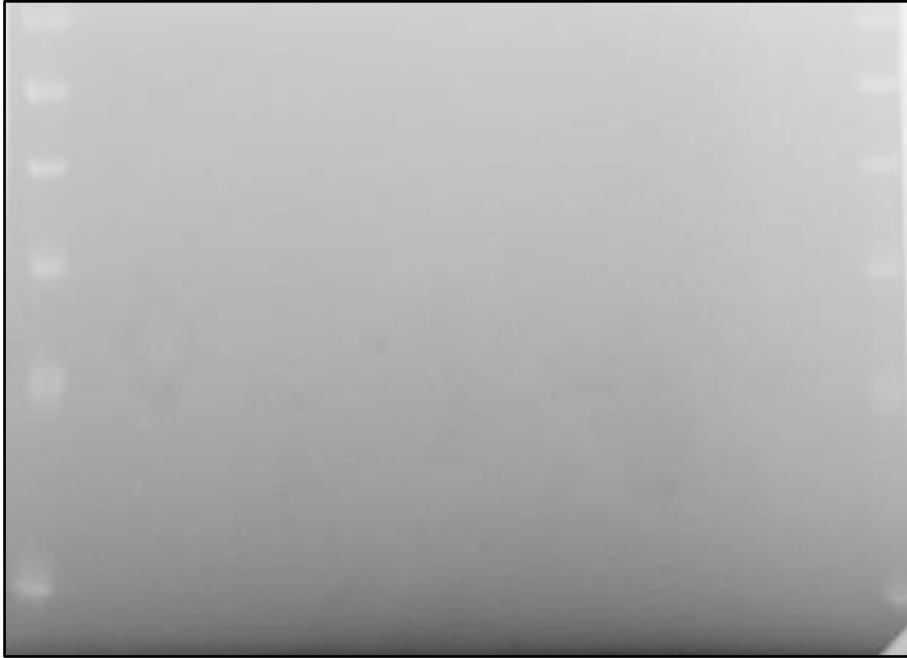

HISTONE H3

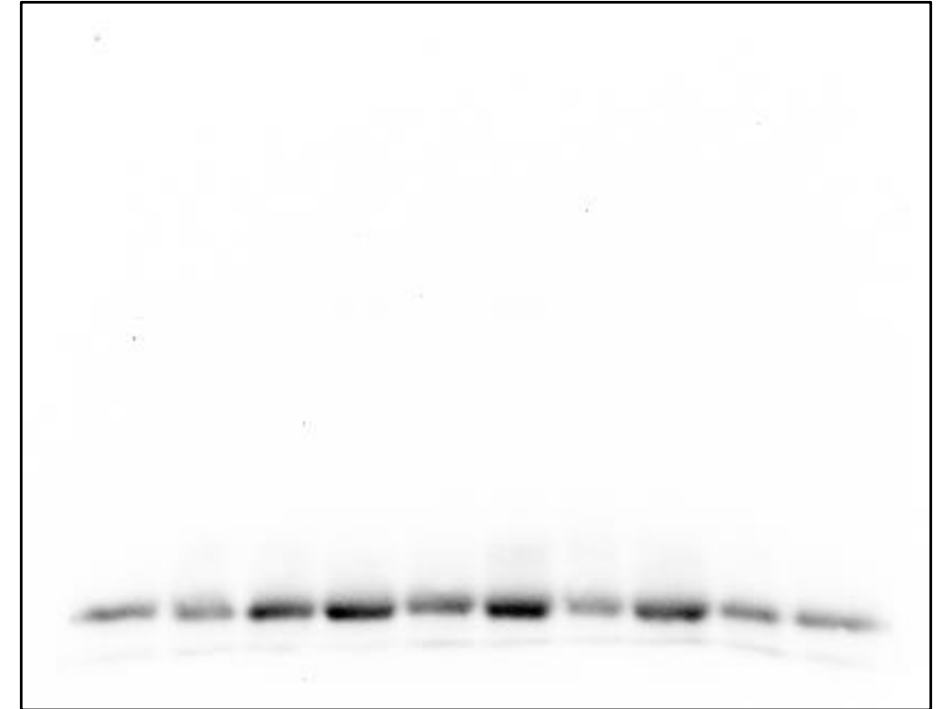

Supplement: s1 [file s1]
