# Supplementary material for: Differential Competitive Growth of Transgenic Subclones of Neuroblastoma Cells Expressing Different Levels of Cathepsin D Co-Cultured in 2D and 3D in Response to EGF: Implications in Tumor Heterogeneity and Metastasis
Source: MDPI journal article supplement (doi:10.3390/cancers16071343), 2024-03-29
Supplement: s1 [file s1]

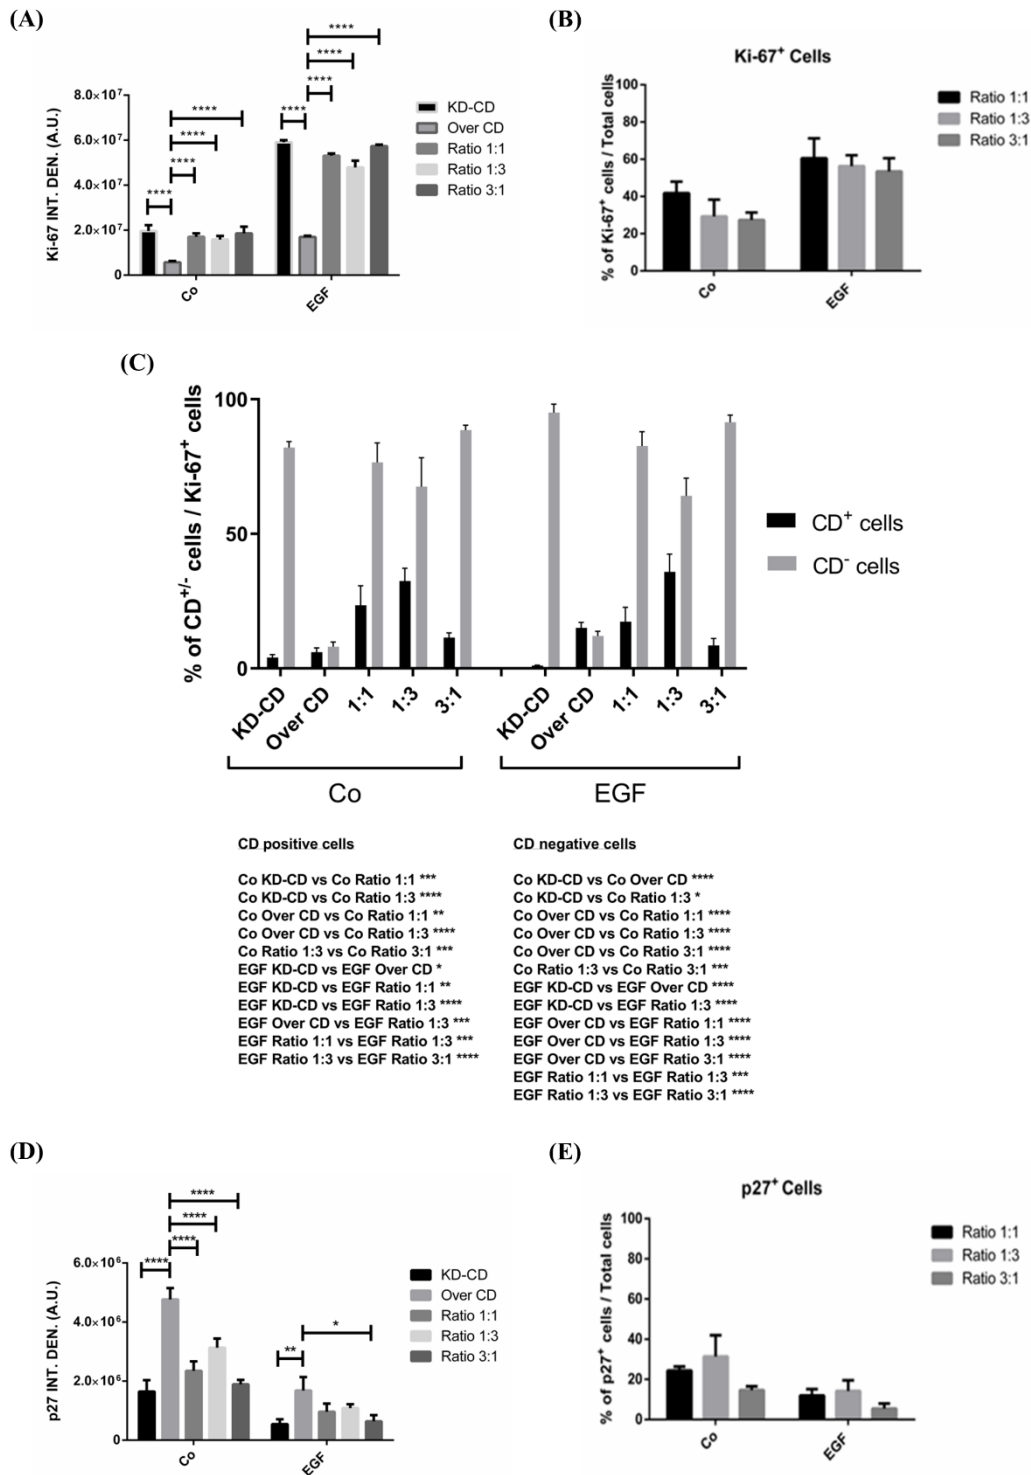

**Supplementary Figure S1. CD knockdown clone expressing high levels of Ki-67 and reduced levels of p27 overtakes Over CD clone in EGF-stimulated growth of mixed cultures.** SH-SY5Y KD-CD, Over CD and mixed cultures at different ratios (50% KD-CD + 50% Over CD cells (1:1), 25% KD-CD + 75% Over CD (1:3)

and 75% KD-CD + 25% Over CD cells (3:1)) were cultured for 72 hours in the presence or not of EGF. At the end of the treatment, cells were fixed and stained for Ki-67-CD and p27-CD. A) Quantification of Ki-67 fluorescent signal was performed by ImageJ software. B) Graph reporting the percentages of Ki-67<sup>+</sup> cells relative to the total cell population. C) Graph reporting the percentages of CD<sup>-</sup> and CD<sup>+</sup> cells relative to the total number of Ki-67<sup>+</sup> cells. D) Quantification of p27 fluorescent signal was performed by ImageJ software. E) Graph reporting the percentages of p27<sup>+</sup> cells relative to the total cell population. Two-way ANOVA test was performed in all the statistical analysis reported in the graphs. Significance was considered as follow: \*\*\*\*  $p < 0.0001$ ; \*\*\*  $p < 0.001$ ; \*\*  $p < 0.01$ ; \*  $p < 0.05$ .

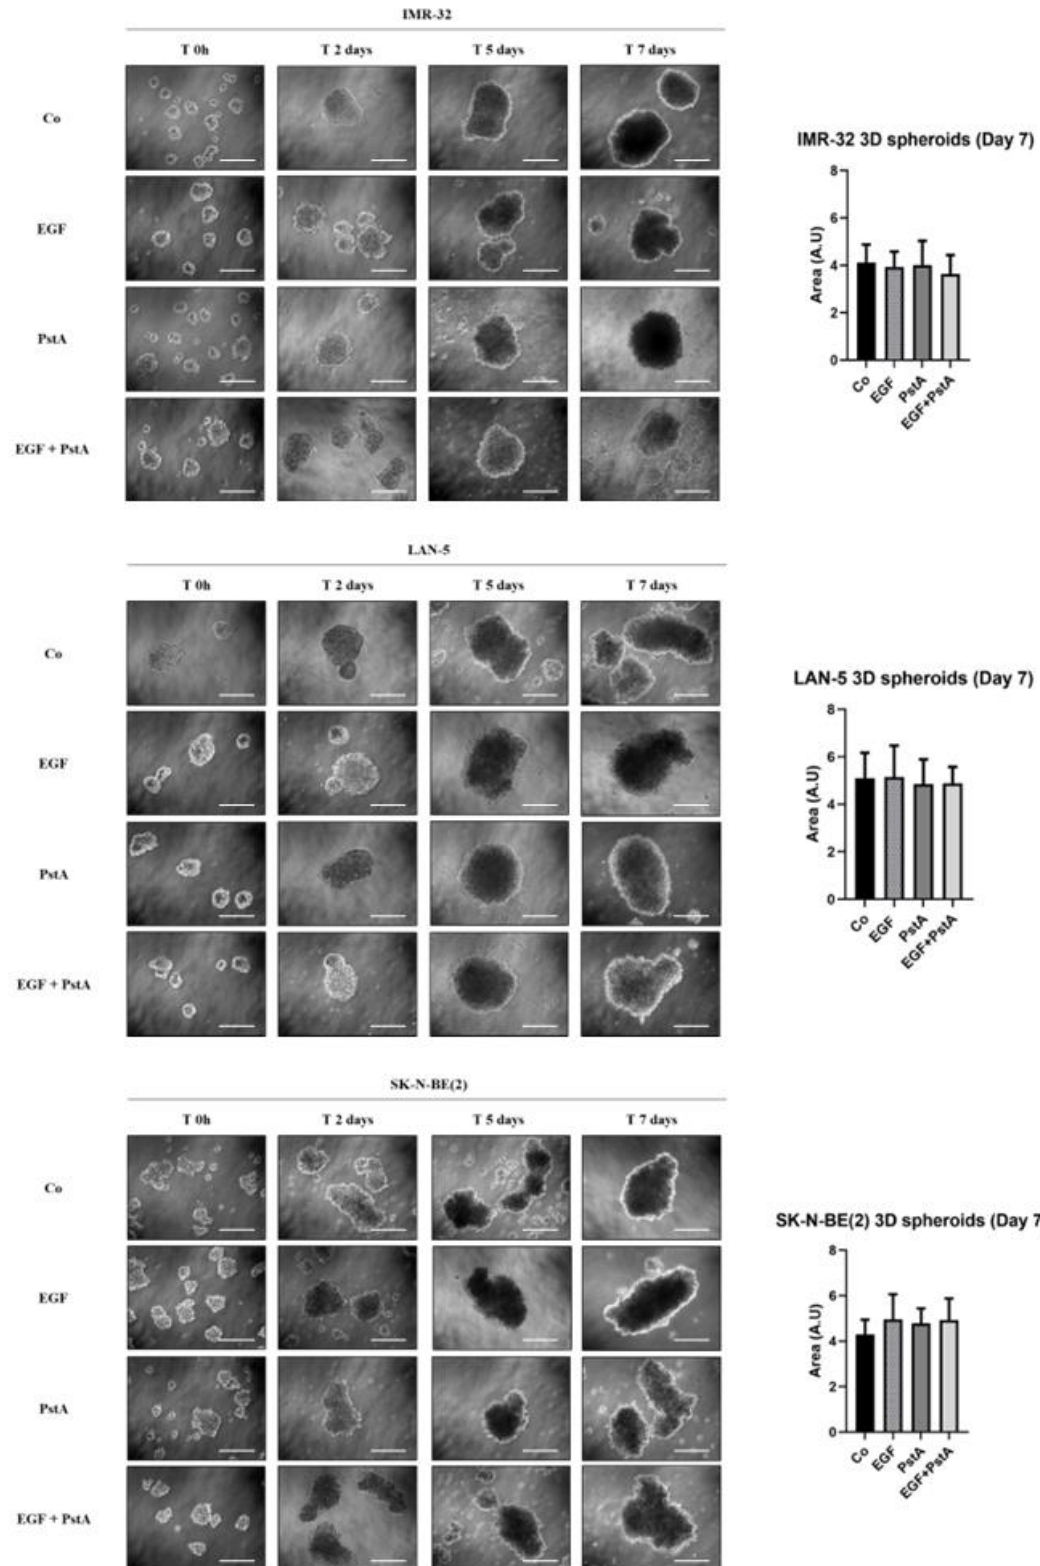

**Supplementary Figure S2. Monitoring of spheroid's formation in MYCN-amplified neuroblastoma cell lines IMR-32, LAN-5 and SK-N-BE(2) in the presence of EGF and/or PstA.** IMR-32, LAN-5 and SK-N-BE(2) cells were plated on non-adherent Petri dishes and let grow for 48 hours to allow spheroid's formation. Cells were cultured for 7 days after the first treatment. At time 0h, cells were incubated with EGF and/or PstA and re-treated in fresh medium at day 2 and 5 until the endpoint of 7 days. In the co-treatment condition, PstA was

added before EGF administration to inhibit the enzymatic activity of CD. The 3D spheroid's growth was monitored at the phase-contrast microscope and images were acquired at different time points (time 0h, 2-, 5- and 7-days). Scale bar=100  $\mu\text{m}$ ; magnification = 20x. Quantification of spheroid's size was obtained through ImageJ software. The area is indicated as Arbitrary Unit (A.U.). Data represent the average  $\pm$  S.D. calculated for at least 5 to 10 spheroids for each condition in three separate experiments.

(A)

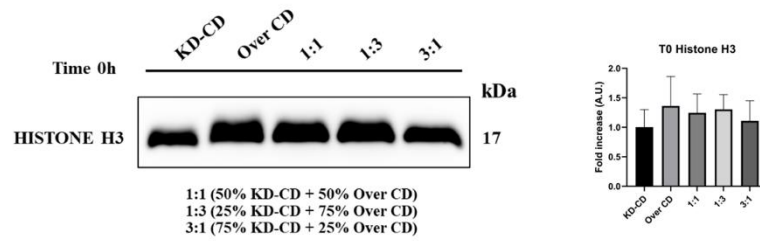

(B)

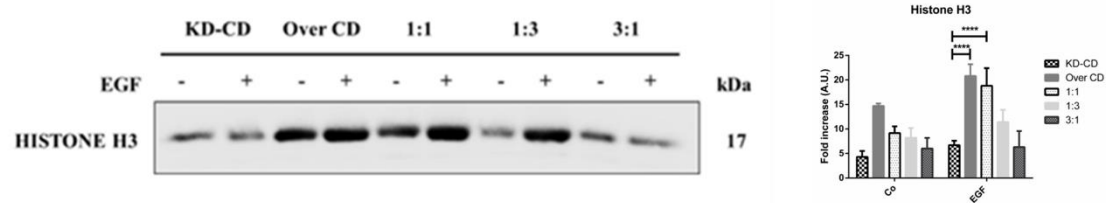

**Supplementary Figure S3. Analysis of histone H3 expression in SH-SY5Y 3D spheroids of pure and mixed clones cocultured in the absence or presence of EGF.** SH-SY5Y 3D spheroids of pure clones or clones mixed at the indicated ratio were cultured for 7 days in the absence or presence of EGF, samples were collected at time 0 (A) and after 7 days (B) and cell homogenates were assayed by western blotting for H3 protein. Densitometry of the bands is reported in the histograms. Significance was considered as follow: \*\*\*\*  $p < 0.0001$ .

(A)

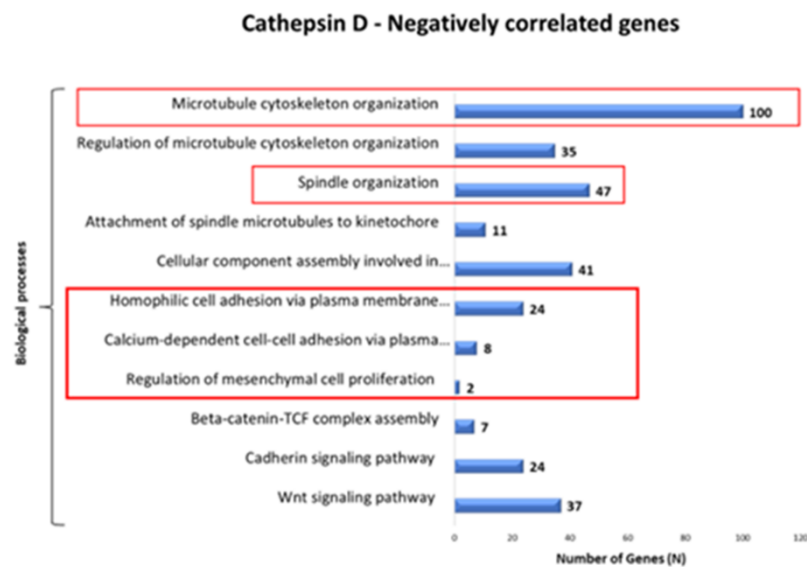

(B)

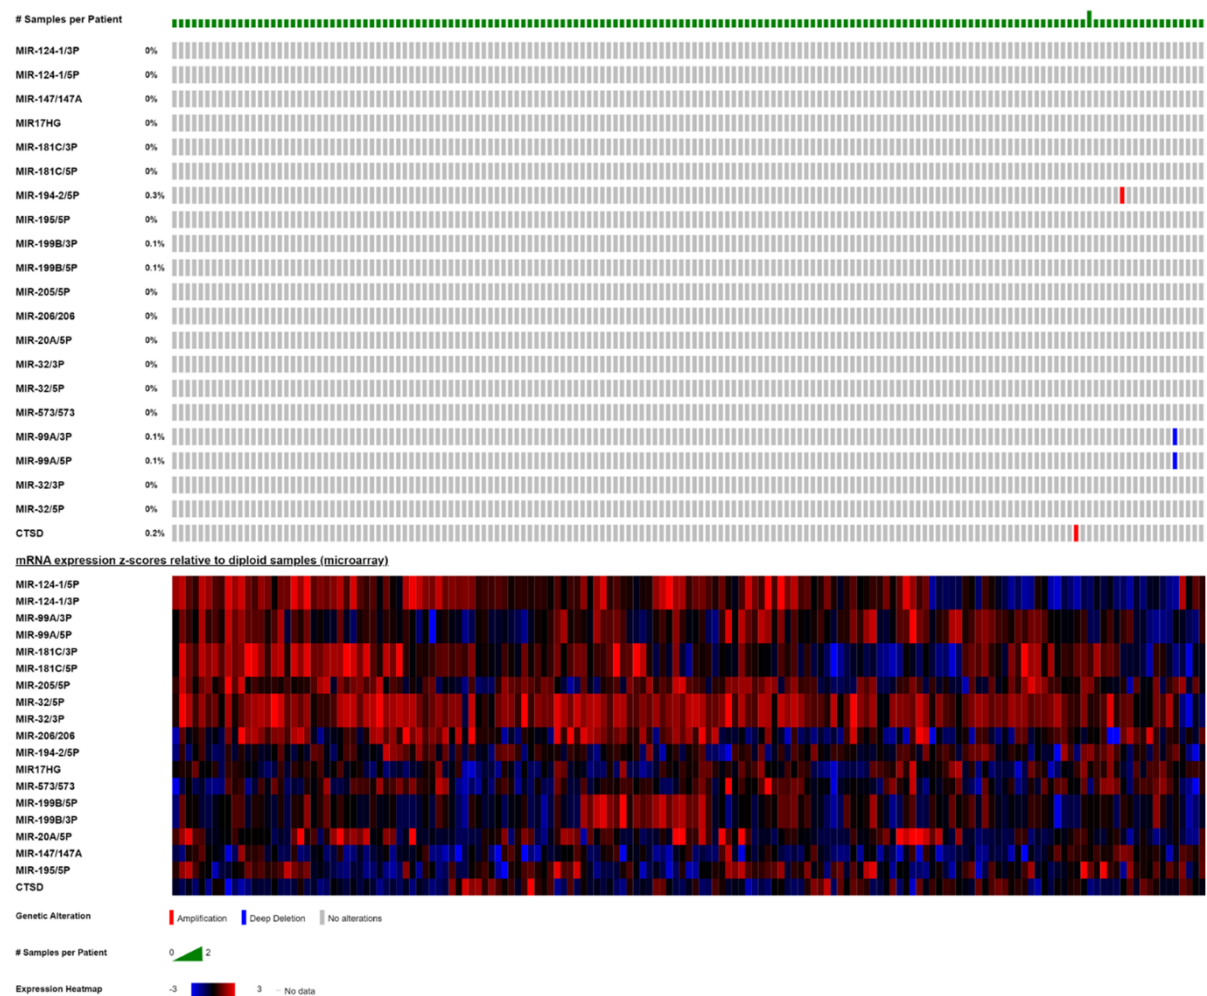

*Supplementary Figure S4. CTSD gene expression negatively correlated genes-modulated biological processes and pathways. A) Graph reporting the CTSD - negatively correlated genes biological processes. B) Oncoprint relative to 20 miRNAs of interest (involved in regulation of cytoskeleton organization, cell*

adhesion, cellular component movement, cell motility, and Wnt signaling pathway) in 248 NB patients. Heatmap displaying the *CTSD* mRNA expression correlated with miRNAs expression.

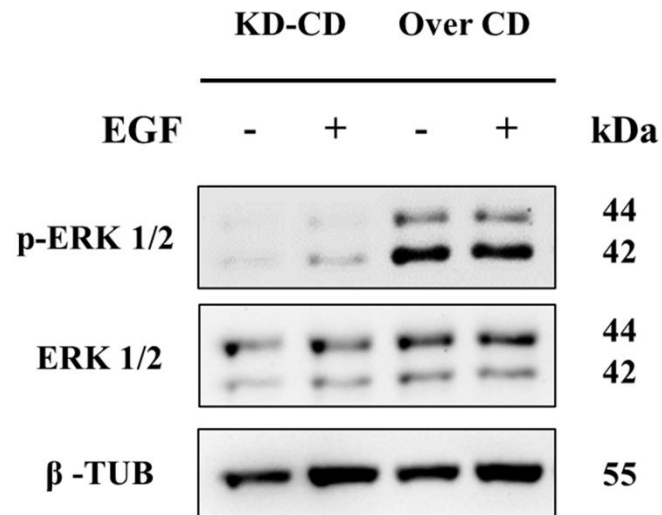

**Supplementary Figure S5. Analysis of p-ERK1/2 phosphorylation in SH-SY5Y 3D spheroids of KD-CD and Over CD clones challenged with EGF.** Western Blotting showing the phosphorylation of ERK 1/2 (p-ERK 1/2) in SH-SY5Y 3D spheroids of KD-CD and Over CD cells cultured in the absence or presence of EGF for 7 days. Samples were processed for western blot analysis of p-ERK 1/2 and total ERK 1/2. Membranes were probed with  $\beta$ -tubulin as loading control.
